# Supplementary material for: Incorporation of V2O5 nanorods into perovskite photodetectors as an alternative approach to enhance device performance: a step towards stability against ambient water species
Source: Royal Society of Chemistry journal article supplement (doi:10.1039/d0dt03177a), 2020-01-01
Supplement: d0dt03177a1.pdf [file d0dt03177a1.pdf]

## Supporting Information

# Incorporation of V<sub>2</sub>O<sub>5</sub> Nanorods as an Alternative Approach to Enhance the Device Performance of Perovskite Photodetector: A Step towards Stability against Ambient Water Species

Nripen Besra<sup>1§</sup>, Kausik Sardar<sup>2§</sup>, Soumen Maiti<sup>3</sup>, Pranab Kumar Sarkar<sup>4</sup>, Tufan Paul<sup>2</sup>, Subhasish Thakur<sup>2</sup>, Gautam Majumdar<sup>5</sup>, and Kalyan Kumar Chattopadhyay<sup>1, 2,\*</sup>

*<sup>1</sup>Department of Physics, Jadavpur University, Kolkata 700032, India*

*<sup>2</sup>School of Materials Science and Nanotechnology, Jadavpur University, Kolkata 700032, India*

*<sup>3</sup>St. Thomas College of Engineering & Technology, Kolkata 700032, India*

*<sup>4</sup>Department of Applied Science & Humanities, Assam University, Silchar, Assam 788011, India*

*<sup>5</sup>Department of Mechanical Engineering, Jadavpur University, Kolkata 700032, India*

\*Corresponding author Tel.: +91 33 2413 8917. Fax: +91 33 2414 6007.

E-mail: kalyan\_chattopadhyay@yahoo.com

## Figure captions

**Figure ES0:** Schematic of the device fabrication process.

**Figure ES1:** (a & c) & (b & d) Low and high magnification FESEM images of samples S1 and S3 respectively.

**Figure ES2:** XPS survey spectrum of S2.

**Figure ES3:** Current voltage characteristics of  $V_2O_5$  NRs under dark and light illumination ( $\lambda = 700$  nm).

**Figure ES4:** Spectral response graph of S2.

**Figure ES5:** Plot of contact angles vs. cycle number for MALI and S2.

**Figure ES6:** Variation of responsivity with varying length and diameter of  $V_2O_5$  nanorods.

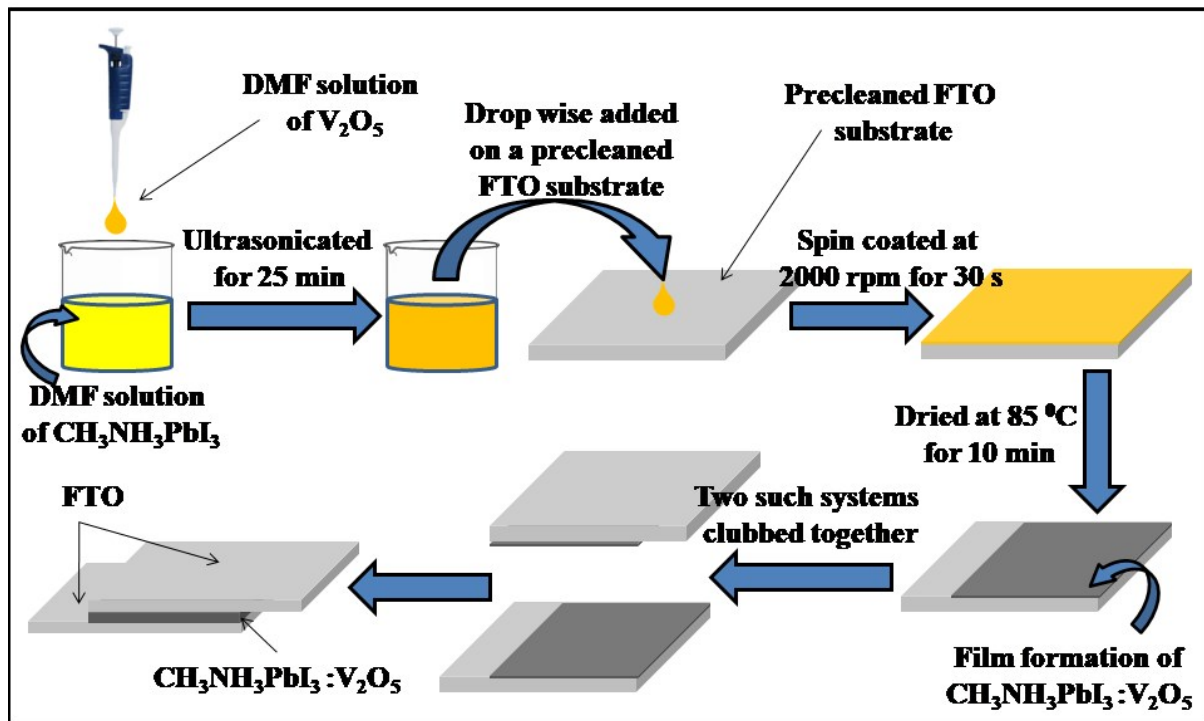

Figure ES0: Nripen et al.

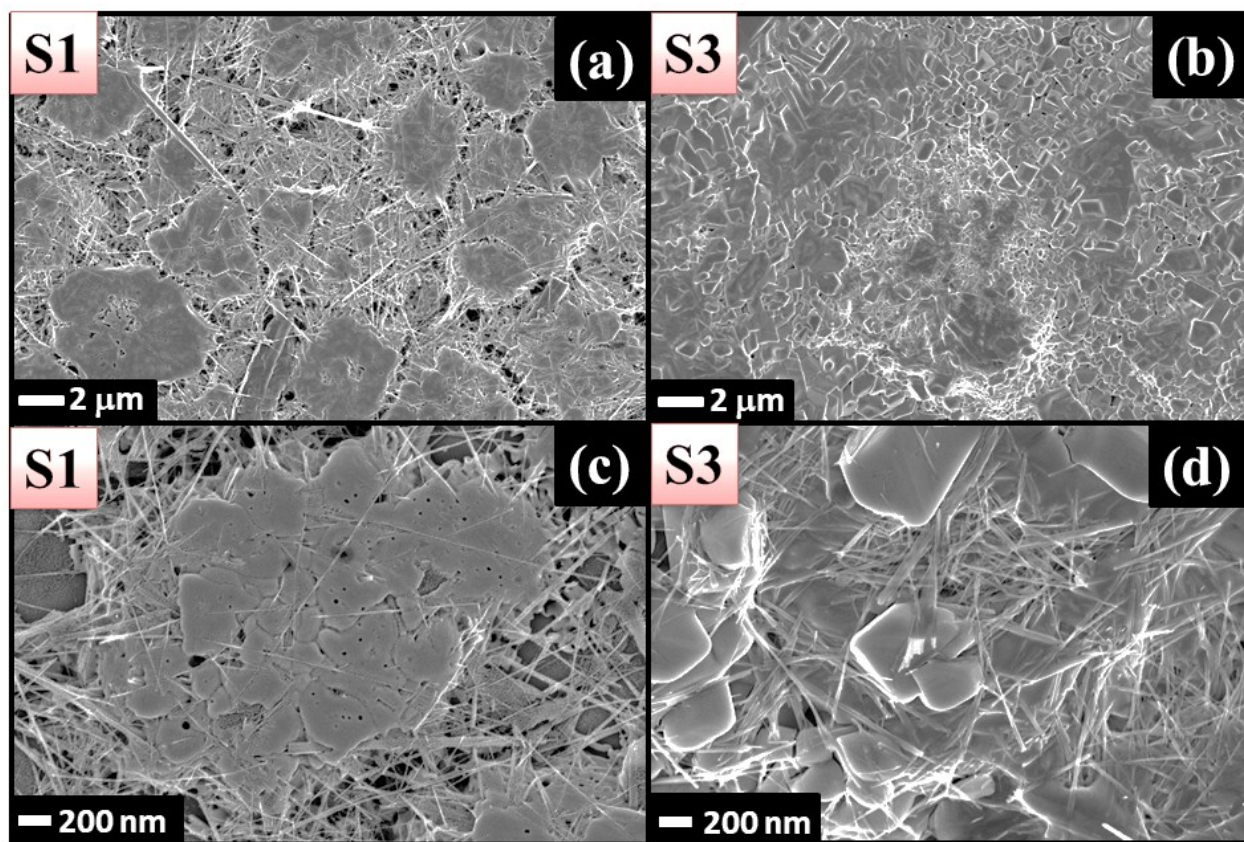

Figure ES1: Nripen et al.

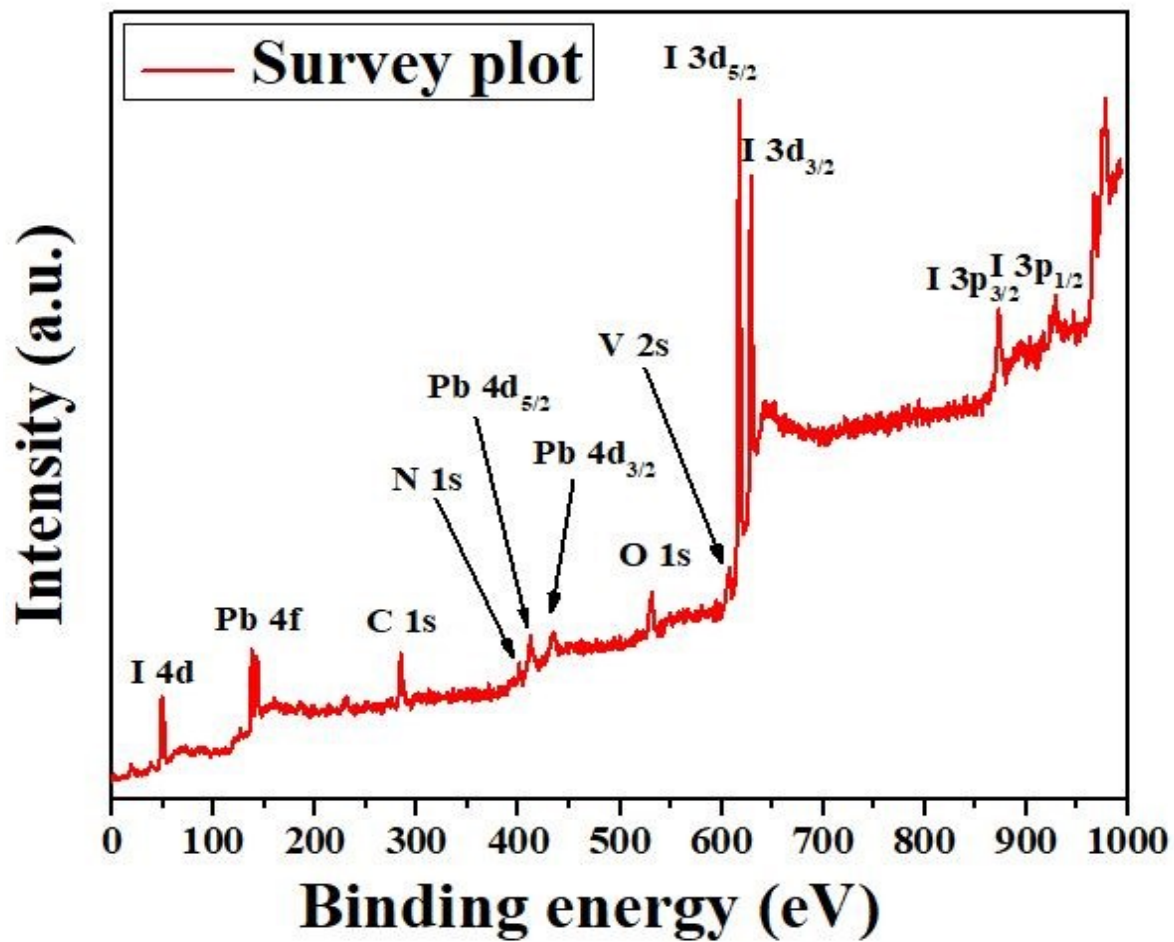

Figure ES2: Nripen et al.

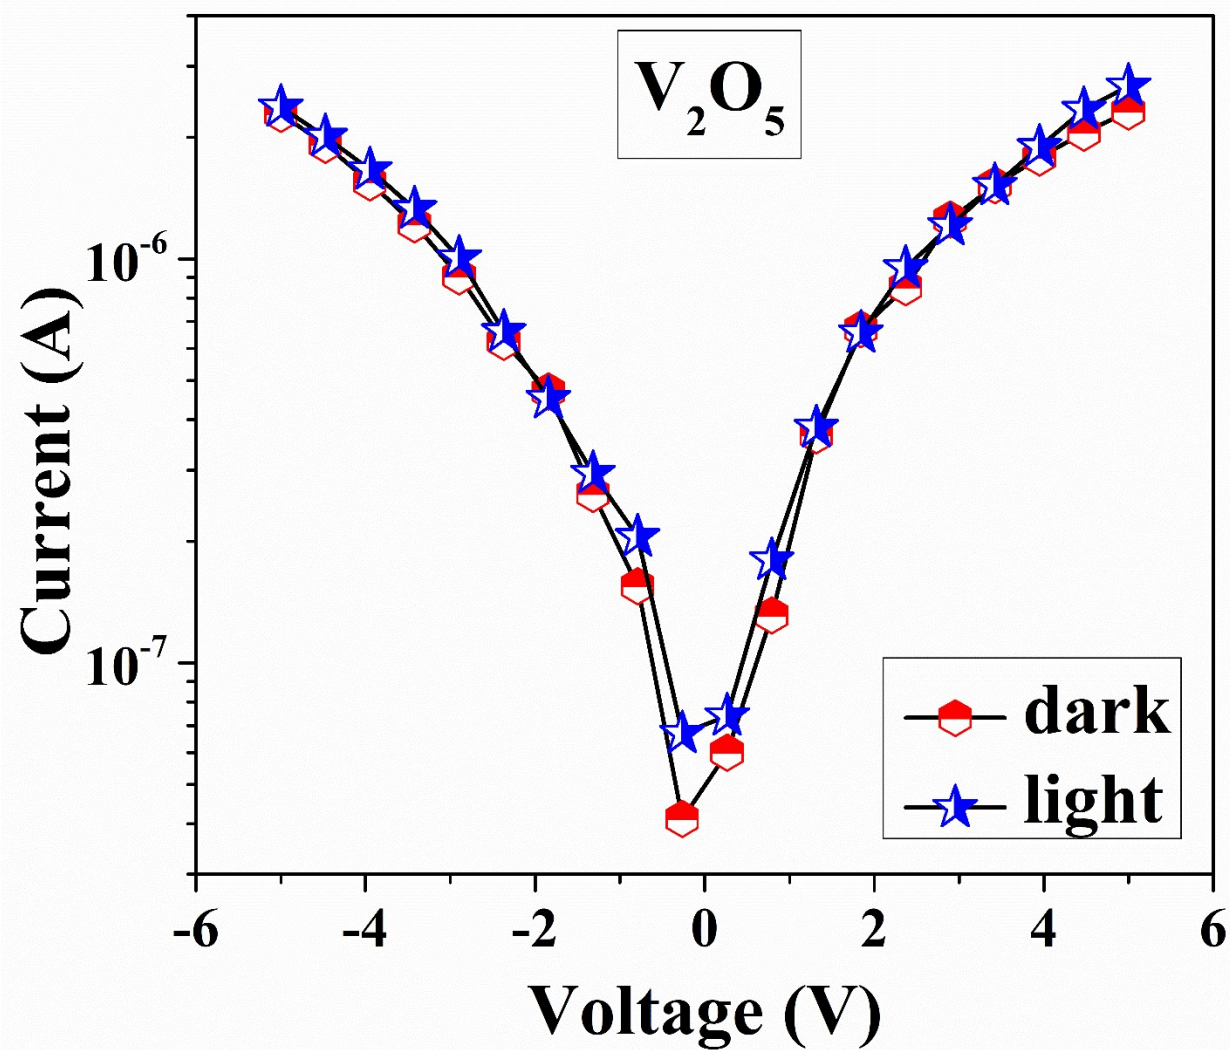

Figure ES3: Nripen et al.

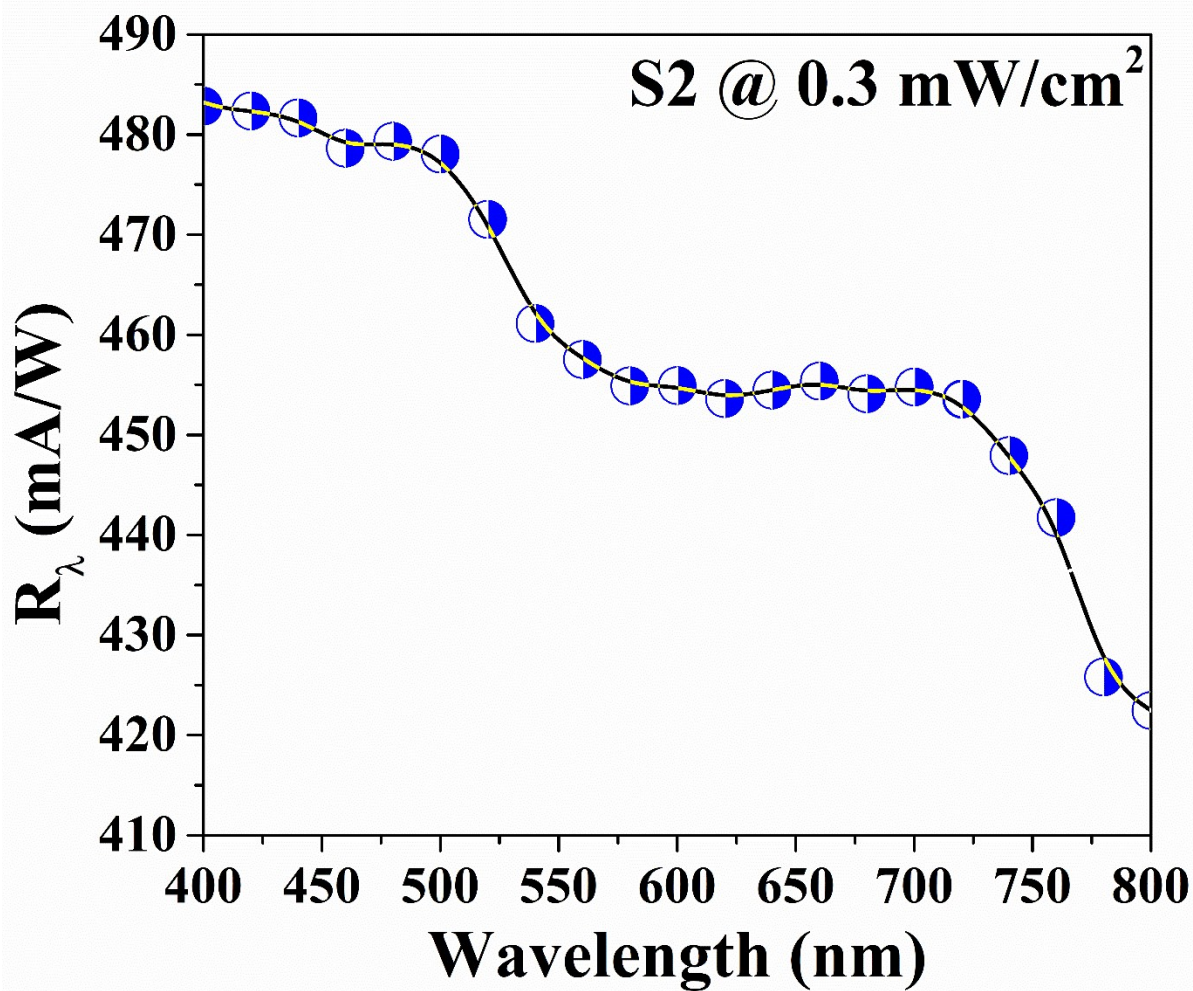

Figure ES4: Nripen et al.

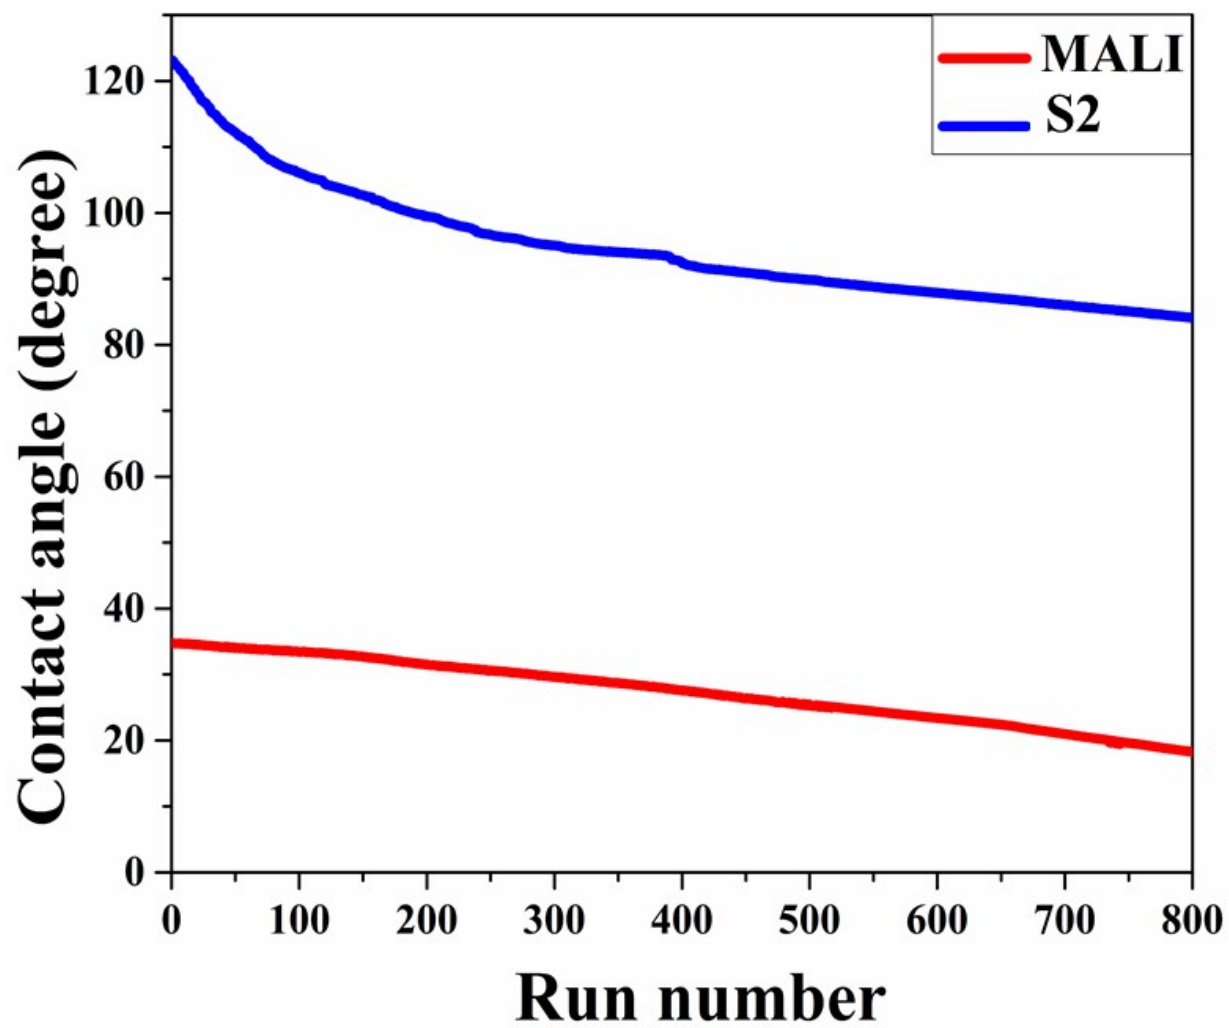

Figure ES5: Nripen et al.



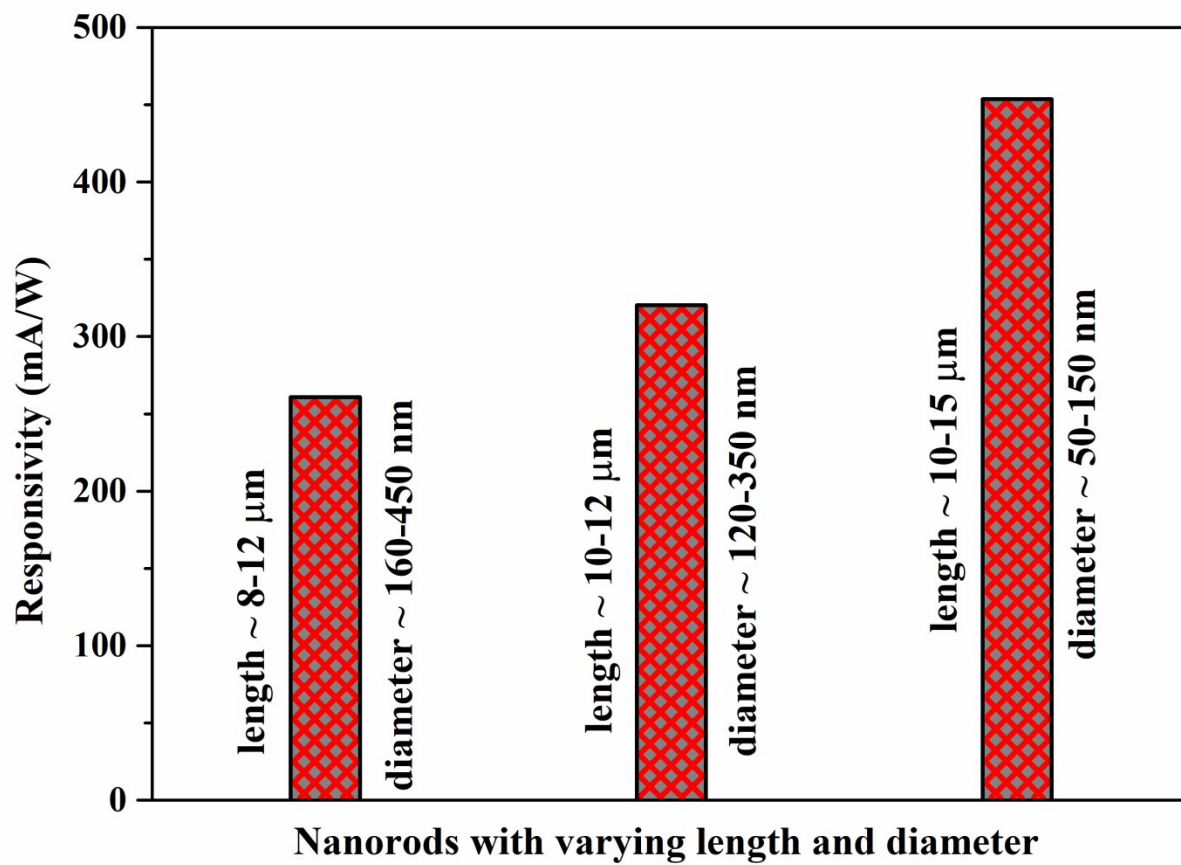

Figure ES6: Nripen et al.
